# Supplementary material for: Ultrasound Versus Computed Tomography for Diaphragmatic Thickness and Skeletal Muscle Index during Mechanical Ventilation
Source: MDPI journal article supplement (doi:10.3390/diagnostics12112890), 2022-11-21

**A**

Right anterior pillar

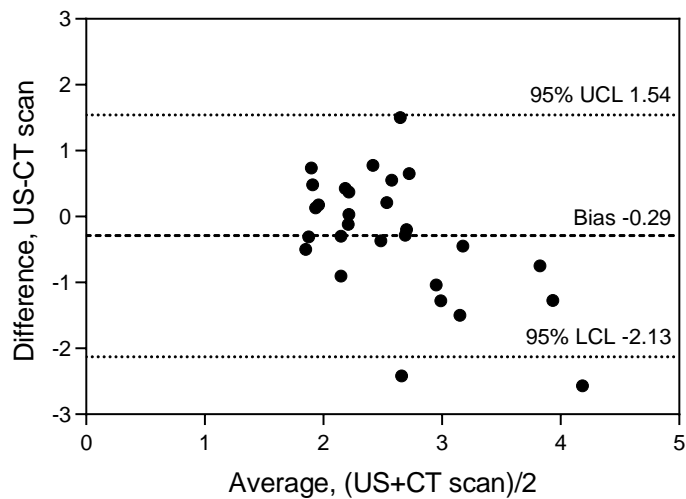**B**

Left anterior pillar

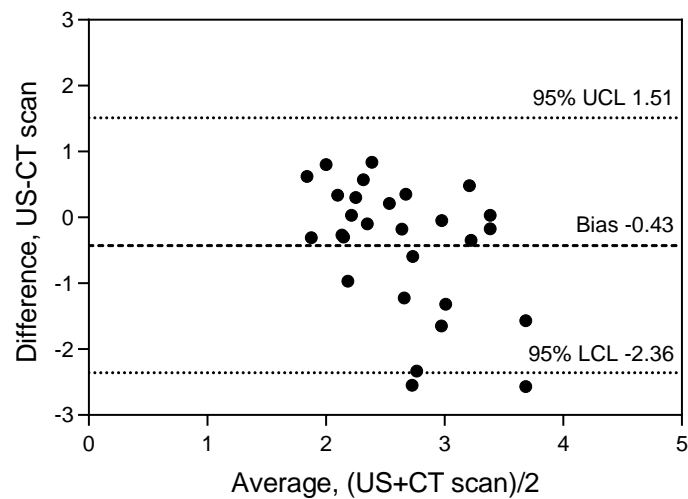**C**

Right posterior pillar

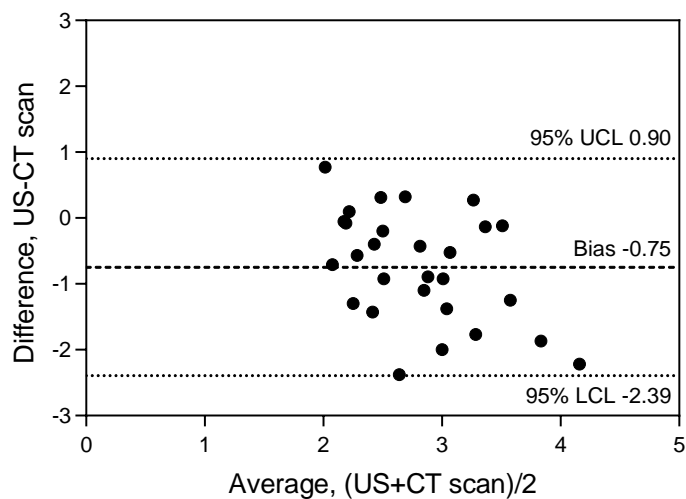**D**

Left posterior pillar

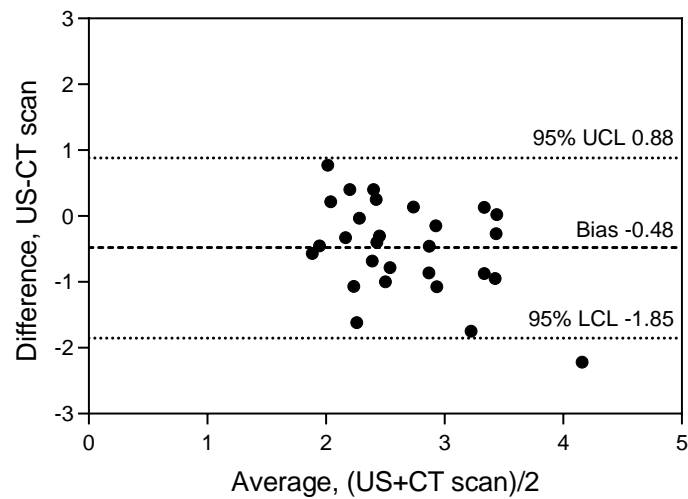**E**

Hepatic dome

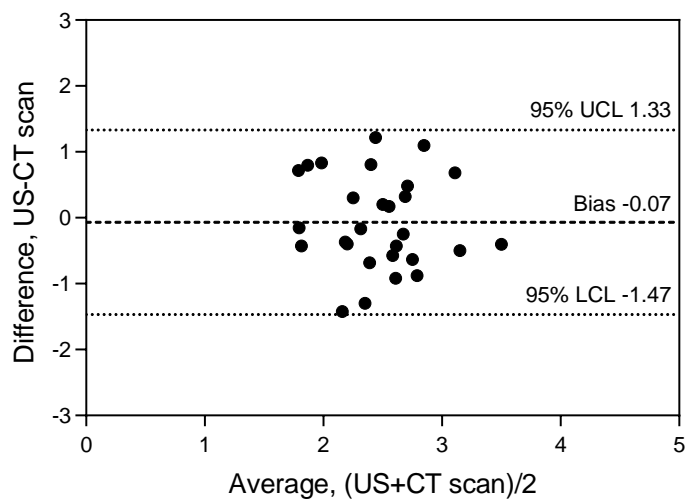**F**

Splenic dome

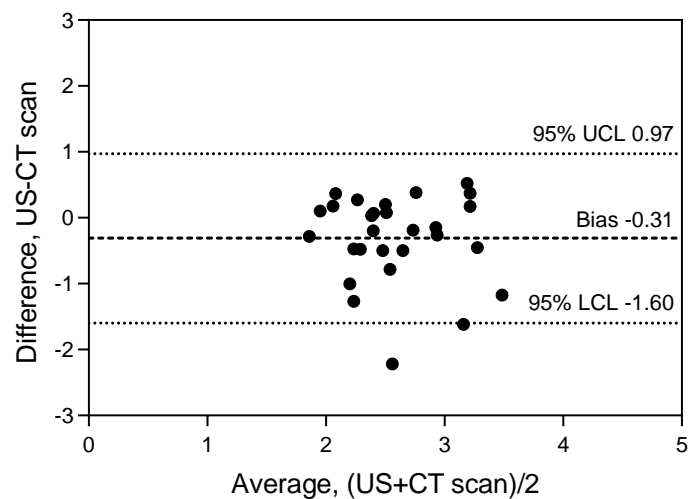

Supplement: s1 [file s1]
