# Supplementary material for: Ultrasound Versus Computed Tomography for Diaphragmatic Thickness and Skeletal Muscle Index during Mechanical Ventilation
Source: MDPI journal article supplement (doi:10.3390/diagnostics12112890), 2022-11-21
Supplement: s1 [file s1]

**Supplemental Table S4.** Comparison of patients with Low versus high Skeletal Muscle Index (SMI).

| Variable                                       | Low SMI (n=14) | High SMI (n=14) | p-value |
|------------------------------------------------|----------------|-----------------|---------|
| Age                                            | 61±13          | 50±13           | 0.028   |
| BMI                                            | 24±3           | 27±5            | 0.181   |
| Sex, M                                         | 10 (71)        | 11 (79)         | 0.663   |
| Ventilation pre-enrollment, days               | 10 (4-18)      | 8 (6-13)        | 0.594   |
| Control MV before enrollment, days             | 5 (3-14)       | 3 (2-6)         | 0.268   |
| Control MV before enrollment, days             | 4 (0-7)        | 4 (2-6)         | 0.723   |
| Fraction of total time spent on assisted MV, % | 30 (0-63)      | 54 (33-78)      | 0.159   |
| Patients on NMB, n (%)                         | 11 (79)        | 10 (71)         | 0.663   |
| Days on NMB, days                              | 5 (3-13)       | 3 (0-4)         | 0.064   |
| Monza                                          | 10 (71)        | 9 (64)          | 1.000   |
| Milano                                         | 4 (29)         | 5 (36)          |         |
| Steroids, n (%)                                | 6 (43)         | 3 (21)          | 0.420   |
| Comorbidity                                    |                |                 |         |
| • Hypertension                                 | 5 (36)         | 1 (7)           | 0.165   |
| • COPD                                         | 1 (7)          | 0 (0)           | 1.000   |
| • DM                                           | 3 (21)         | 0 (0)           | 0.222   |
| • Malignancy                                   | 4 (29)         | 1 (7)           | 0.326   |
| • CKD                                          | 1 (7)          | 0 (0)           | 1.000   |
| • Immunosuppression                            | 5 (36)         | 2 (14)          | 0.385   |
| • Cardiac failure                              | 2 (14)         | 0 (0)           | 0.481   |
| • Liver failure                                | 0 (0)          | 1 (7)           | 1.000   |
| ICU admission                                  |                |                 |         |
| • ARDS                                         | 7 (50)         | 4 (29)          | 0.440   |
| • Asthma                                       | 0 (0)          | 1 (7)           | 1.000   |
| • Sepsis                                       | 2 (14)         | 3 (21)          | 1.000   |
| • Other                                        | 4 (29)         | 2 (14)          | 0.648   |
| • Trauma                                       | 0 (0)          | 2 (14)          | 0.481   |
| • Pancreatitis                                 | 1 (7)          | 1 (7)           | 1.000   |
| • Liver failure                                | 0 (0)          | 1 (7)           | 1.000   |
| Duration of MV, days                           | 25 (16-49)     | 20 (15-36)      | 0.434   |
| Right anterior pillar, mm                      | 2.6±0.8        | 2.8±1.2         | 0.542   |
| Left anterior pillar, mm                       | 3.0±1.0        | 2.7±0.8         | 0.357   |
| Right posterior pillar, mm                     | 3.2±0.6        | 3.2±1.0         | 0.962   |
| Left posterior pillar, mm                      | 2.8±0.6        | 3.0±0.9         | 0.460   |
| Hepatic dome, mm                               | 2.5±0.5        | 2.4±0.6         | 0.641   |
| Splenic dome, mm                               | 2.8±0.6        | 2.8±0.6         | 0.963   |

|                                          |         |         |        |
|------------------------------------------|---------|---------|--------|
| Mean diaphragmatic thickness (by CT), mm | 2.8±0.6 | 2.8±0.7 | 0.989  |
| Diaphragmatic thickness (by US, mm       | 2.1±0.4 | 2.7±0.5 | <0.001 |

Definition of abbreviations: ARDS = acute respiratory distress syndrome; BMI = body mass index; CKD = Chronic kidney disease; COPD = chronic obstructive pulmonary disease; DM = Diabetes mellitus; ICU = intensive care unit; NYHA = New York Heart Association; SD = standard deviation; SMI= Skeletal Muscle Index; US = ultrasound, CT-scan = Computerized Tomographic Scan. \* High doses of corticosteroids: > 1 mg/kg of Methylprednisolone.
