# Supplementary material for: Ultrasound Versus Computed Tomography for Diaphragmatic Thickness and Skeletal Muscle Index during Mechanical Ventilation
Source: MDPI journal article supplement (doi:10.3390/diagnostics12112890), 2022-11-21
Supplement: s1 [file s1]

**Supplemental Table S3.** Correlation between CT measurements of the diaphragm and levels of skeletal muscle index.

| Diaphragmatic areas<br>Sampled by CT scan |         | Correlation with sarcopenia<br>(SMI = TMA/h <sup>2</sup> ) |
|-------------------------------------------|---------|------------------------------------------------------------|
| Right anterior pillar                     | r       | 0.354                                                      |
|                                           | p-value | 0.070                                                      |
| Right posterior pillar                    | R       | 0.055                                                      |
|                                           | p-value | 0.784                                                      |
| Hepatic dome                              | r       | 0.170                                                      |
|                                           | p-value | 0.395                                                      |
| Left anterior pillar                      | r       | - 0.005                                                    |
|                                           | p-value | 0.993                                                      |
| Left posterior pillar                     | r       | 0.200                                                      |
|                                           | p-value | 0.317                                                      |
| Splenic dome                              | r       | 0.161                                                      |
|                                           | p-value | 0.423                                                      |
| Mean diaphragmatic thickness              | r       | 0.194                                                      |
|                                           | p-value | 0.332                                                      |

Pearson correlation coefficient (r) and p-value between diaphragmatic thickness measurements

using CT-scan and skeletal muscle index. Definition of abbreviations: CT = computed tomography;

h = height expressed as meter; SMI = skeletal muscle index; TMA = total muscle area.
