# Supplementary material for: Ultrasound Versus Computed Tomography for Diaphragmatic Thickness and Skeletal Muscle Index during Mechanical Ventilation
Source: MDPI journal article supplement (doi:10.3390/diagnostics12112890), 2022-11-21
Supplement: s1 [file s1]

| Demographic and clinical features                              | N=29               |
|----------------------------------------------------------------|--------------------|
| Age, years                                                     | 55 ± 14            |
| BMI, kg/m <sup>2</sup>                                         | 24.7 (22.5 – 27.5) |
| Sex, n (%) male                                                | 22 (75.9%)         |
| Enrolled patients, n (%):                                      |                    |
| • Monza                                                        | 20 (70%)           |
| • Milano                                                       | 9 (30%)            |
| Controlled MV before enrollment, days                          | 4 (2 – 8)          |
| Assisted MV before enrollment, days                            | 4 (1– 6)           |
| Total ventilation before enrollment, days                      | 9 (5 – 14)         |
| Fraction of total time spent on assisted MV, %                 | 44 ± 34            |
| Neuromuscular blockers administered at any time, n (%)         | 22 (75.9%)         |
| Days of neuromuscular blocking                                 | 3 (2 – 7)          |
| High doses of corticosteroids* administered at any time, n (%) | 9 (31%)            |
| Comorbidity, n (%):                                            |                    |
| • Hypertension                                                 | 6 (21%)            |
| • COPD                                                         | 1 (3.4%)           |
| • DM                                                           | 3 (10.3%)          |
| • Malignancy                                                   | 5 (17.2%)          |
| • CKD                                                          | 1 (3.4%)           |
| • Immunosuppression                                            | 7 (24.1%)          |
| • Cardiac failure (NYHA class III – IV)                        | 2 (6.9%)           |
| • Liver failure (Child-Pugh C)                                 | 1 (3.4%)           |

|                                          |            |
|------------------------------------------|------------|
| Primary reason for ICU admission, n (%): |            |
| • ARDS                                   | 11 (37.9%) |
| • Asthma                                 | 1 (3.5%)   |
| • Other respiratory failure              | 6 (20.7%)  |
| • Sepsis or septic shock                 | 5 (17.2%)  |
| • Trauma                                 | 3 (10.3%)  |
| • Severe acute pancreatitis              | 2 (6.9 %)  |
| • Liver failure                          | 1 (3.5%)   |

**Supplemental Table S1.** Demographic and clinical characteristics of enrolled patients at the time of enrollment. Definition of abbreviations: ARDS = acute respiratory distress syndrome; BMI = body mass index; CKD = Chronic kidney disease; COPD = chronic obstructive pulmonary disease; CT-scan = Computerized Tomographic Scan; DM = Diabetes mellitus; ICU = intensive care unit; NYHA = New York Heart Association; SD = standard deviation; US = ultrasound. \* High doses of corticosteroids: > 1 mg/kg of Methylprednisolone.
