# Supplementary material for: Ultrasound Versus Computed Tomography for Diaphragmatic Thickness and Skeletal Muscle Index during Mechanical Ventilation
Source: MDPI journal article supplement (doi:10.3390/diagnostics12112890), 2022-11-21
Supplement: s1 [file s1]

**Supplemental Table S2.** Correlation between Computerized Tomography measurements.

| Diaphragmatic areas sampled by CT-scan |         | Right posterior pillar | Hepatic dome | Left anterior pillar | Left posterior pillar | Splenic dome |
|----------------------------------------|---------|------------------------|--------------|----------------------|-----------------------|--------------|
| Right anterior pillar                  | r       | 0.604                  | 0.754        | 0.644                | 0.531                 | 0.638        |
|                                        | p-value | 0.001                  | <0.001       | <0.001               | 0.004                 | <0.001       |
| Right posterior pillar                 | r       |                        | 0.376        | 0.579                | 0.779                 | 0.557        |
|                                        | p-value |                        | 0.049        | 0.001                | <0.001                | 0.002        |
| Hepatic dome                           | r       |                        | 1            | 0.622                | 0.436                 | 0.553        |
|                                        | p-value |                        |              | <0.001               | 0.020                 | 0.002        |
| Left anterior pillar                   | r       |                        |              | 1                    | 0.603                 | 0.709        |
|                                        | p-value |                        |              |                      | 0.001                 | <0.001       |
| Left posterior pillar                  | r       |                        |              |                      | 1                     | 0.679        |
|                                        | p-value |                        |              |                      |                       | <0.001       |
| Splenic dome                           | r       |                        |              |                      |                       | 1            |
|                                        | p-value |                        |              |                      |                       |              |

Pearson correlation coefficient (r) and p-value between diaphragmatic thickness measurements

using CT-scan. Definition of abbreviations: CT-scan = Computerized Tomographic Scan.
